# Supplementary material for: A Pilot Study to Detect Viable Salmonella spp. in Diarrheal Stool Using Viability Real-Time PCR as a Culture-Independent Diagnostic Tool in a Clinical Setting
Source: MDPI journal article supplement (doi:10.3390/ijms24129979), 2023-06-10
Supplement: s1 [file s1]

**Supplementary Table S1.** qPCR and vPCR data of the clinical stools tested

| Average Ct value |              |                  |              |                  | Average Ct value |       |                  |       |                  |
|------------------|--------------|------------------|--------------|------------------|------------------|-------|------------------|-------|------------------|
| ID               | qPCR         |                  | vPCR         |                  | ID               | qPCR  |                  | vPCR  |                  |
|                  | Neat         | 1:10<br>dilution | Neat         | 1:10<br>dilution |                  | Neat  | 1:10<br>dilution | Neat  | 1:10<br>dilution |
| 1                | 22.10        | 25.15            | 22.84        | 26.54            | 44               | 25.92 | NA               | 27.93 | NA               |
| 2                | 15.87        | 18.84            | 16.75        | 20.60            | 45               | 17.55 | NA               | 18.05 | NA               |
| <b>3*</b>        | <b>34.48</b> | 36.47            | <b>36.34</b> | 35.36            | 46               | 21.98 | NA               | 22.82 | NA               |
| <b>4#</b>        | <b>29.71</b> | 33.28            | <b>32.67</b> | 35.93            | 47               | 17.21 | 20.27            | 17.92 | 19.49            |
| 5                | 17.67        | 20.75            | 18.53        | 21.67            | 48               | 21.46 | 25.03            | 23.15 | 26.77            |
| 6                | 18.77        | 21.81            | 20.01        | 23.26            | 49               | 28.46 | 32.74            | 29.56 | 32.95            |
| 7                | 16.89        | 19.84            | 18.89        | 22.44            | 50               | 25.65 | 28.63            | 26.20 | 30.10            |
| 8                | 16.32        | 19.74            | 18.47        | 21.66            | 51               | 16.11 | 19.25            | 17.01 | 20.32            |
| <b>9#</b>        | <b>30.53</b> | UD               | <b>33.08</b> | 34.04            | 52               | 27.27 | 30.49            | 29.02 | 31.93            |
| 10               | 19.67        | 22.68            | 20.17        | 23.31            | 53               | 23.50 | 26.86            | 25.97 | 29.49            |
| 11               | 15.11        | 18.73            | 15.85        | 19.64            | 54               | 16.23 | 20.09            | 19.58 | 22.79            |
| 12               | 26.22        | 29.43            | 26.05        | 29.08            | 55               | 22.64 | 25.97            | 24.89 | 28.26            |
| 13               | 18.51        | 21.38            | 19.82        | 23.18            | 56               | 19.58 | 22.56            | 19.84 | 23.50            |
| 14               | 24.83        | 27.85            | 25.49        | 28.75            | 57               | 27.83 | 31.63            | 28.80 | 32.23            |
| <b>15*</b>       | <b>30.43</b> | 33.70            | <b>34.69</b> | UD               | 58               | 17.95 | 21.36            | 18.97 | 22.41            |
| 16               | 16.80        | 20.27            | 17.59        | 20.94            | 59               | 20.27 | 23.96            | 22.46 | 25.85            |
| 17               | 19.24        | 22.37            | 22.93        | 26.01            | 60               | 27.96 | 30.91            | 28.07 | 31.55            |
| 18               | 17.78        | 20.88            | 20.24        | 23.35            | 61               | 21.32 | 24.56            | 23.35 | 26.51            |
| 19               | 15.81        | 19.12            | 18.24        | 21.73            | 62               | 23.60 | 26.99            | 25.80 | 28.79            |
| 20               | 21.47        | 24.63            | 23.89        | 27.12            | 63               | 21.24 | 23.89            | 21.04 | 23.84            |
| 21               | 26.63        | 30.24            | 28.54        | 31.21            | 64               | 15.34 | 18.64            | 19.69 | 23.32            |
| <b>22*</b>       | <b>31.36</b> | 32.83            | <b>33.73</b> | UD               | 65               | 15.50 | 18.82            | 17.52 | 20.89            |
| 23               | 15.89        | 19.18            | 18.74        | 21.83            | 66               | 24.55 | 27.87            | 27.63 | 31.93            |
| <b>24#</b>       | <b>29.88</b> | 33.71            | <b>31.92</b> | 35.56            | 67               | 17.04 | 20.42            | 19.63 | 22.84            |
| 25               | 17.31        | 20.75            | 19.94        | 22.96            | 68               | 23.79 | 27.53            | 25.80 | 29.46            |

|            |              |       |              |       |    |       |       |       |       |
|------------|--------------|-------|--------------|-------|----|-------|-------|-------|-------|
| 26         | 19.15        | 22.68 | 21.53        | 24.79 | 69 | 21.87 | 25.19 | 22.17 | 25.39 |
| 27         | 19.20        | 20.23 | 22.53        | 23.53 | 70 | 16.79 | 20.21 | 18.09 | 21.07 |
| 28         | 13.48        | 14.86 | 16.51        | 18.14 | 71 | 27.79 | 29.53 | 27.98 | 31.20 |
| <b>29*</b> | <b>27.39</b> | 27.95 | <b>30.70</b> | 32.12 | 72 | 17.75 | 21.77 | 18.92 | 22.16 |
| 30         | 21.35        | 22.35 | 24.94        | 25.04 | 73 | 16.29 | 19.78 | 17.39 | 20.68 |
| 31         | 20.04        | 22.31 | 23.38        | 25.80 | 74 | 18.20 | 21.57 | 20.05 | 23.18 |
| <b>32*</b> | <b>31.82</b> | 31.27 | <b>31.88</b> | 32.55 | 75 | 27.66 | 30.70 | 27.06 | 30.11 |
| <b>33*</b> | <b>UD</b>    | 31.18 | <b>32.25</b> | 30.65 | 76 | 17.06 | 19.66 | 19.03 | 22.24 |
| 34         | 21.81        | 25.11 | 24.80        | 27.86 | 77 | 16.11 | 19.23 | 20.86 | 24.07 |
| 35         | 23.32        | 26.76 | 26.78        | 30.74 | 78 | 22.09 | 24.98 | 23.50 | 26.25 |
| 36         | 19.29        | 22.59 | 18.33        | 21.79 | 79 | 15.29 | 18.63 | 16.12 | 19.32 |
| 37         | 22.86        | 26.46 | 23.89        | 27.79 | 80 | 22.56 | 25.61 | 24.10 | 27.17 |
| 38         | 19.82        | 22.86 | 20.23        | 23.71 | 81 | 17.79 | 20.78 | 24.68 | 28.75 |
| 39         | 12.21        | 15.66 | 14.32        | 17.43 | 82 | 18.96 | 22.10 | 21.45 | 24.94 |
| 40         | 21.03        | 24.36 | 24.72        | 27.79 | 83 | 21.85 | 24.84 | 23.17 | 25.59 |
| 41         | 14.71        | NA    | 14.87        | NA    | 84 | 24.77 | 27.81 | 29.54 | 32.18 |
| 42         | 17.98        | NA    | 20.61        | NA    | 85 | 21.60 | 24.93 | 23.97 | 27.46 |
| 43         | 21.84        | NA    | 23.98        | NA    |    |       |       |       |       |

All stools initially tested positive for Salmonella spp. using BD MAX™ and serotypes have been isolated. UD: undetected; NA: Data not available; Ct: cycle threshold; qPCR: real-time PCR; vPCR: viability PCR. All stools were either semi-solid or liquid and fell under type 6 and 7 of the Bristol Stool Form Scale. \* Stools that tested qPCR and vPCR negative (n=4). # Stools that tested qPCR positive and vPCR negative (n=5).

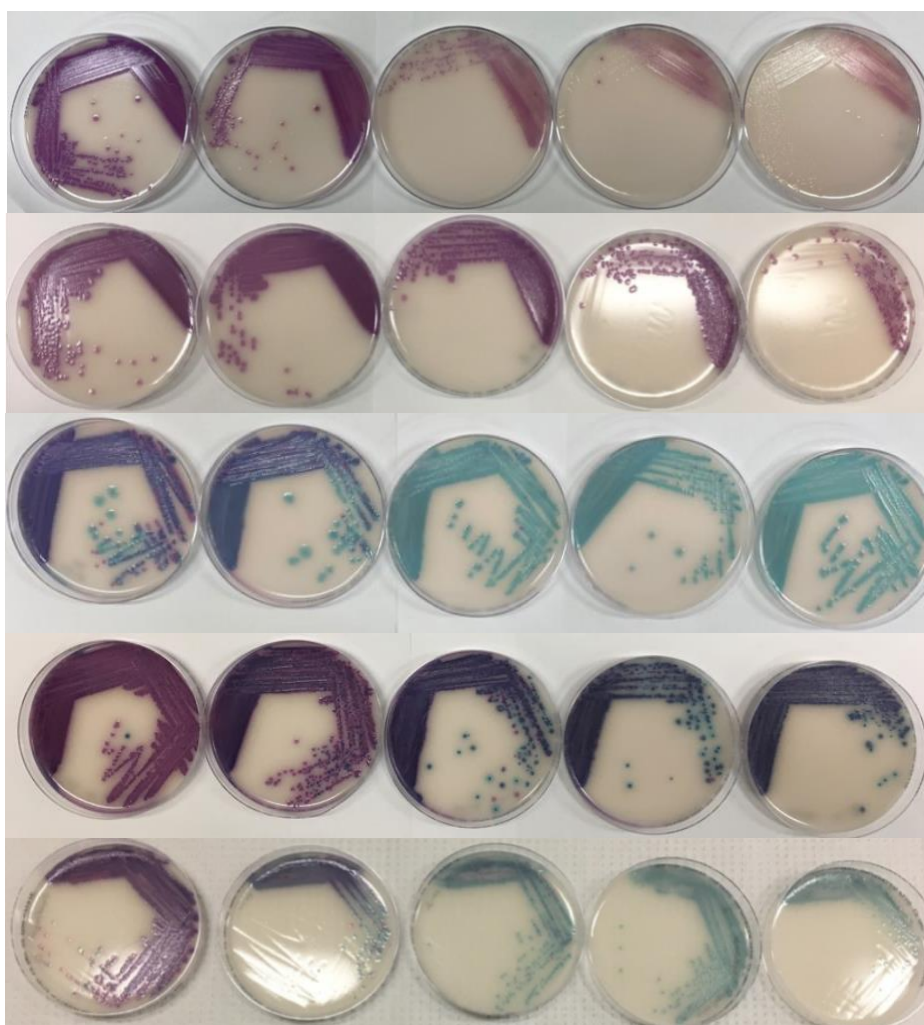

|                                           |        |        |        |        |        |
|-------------------------------------------|--------|--------|--------|--------|--------|
| Bacterial cell dilution                   | Neat   | -1     | -2     | -3     | -4     |
| Bacterial cell count<br>(CFU/ 10 $\mu$ L) | $10^7$ | $10^6$ | $10^5$ | $10^4$ | $10^3$ |

**Supplementary Figure S1:** Quadrant growth of five replicates from the stool broth standard curves.
